# Structural differences in adolescent brains can predict alcohol misuse

Roshan Prakash Rane <sup>\*,1</sup>, Evert Ferdinand de Man <sup>2</sup>, JiHoon Kim<sup>3</sup>, Kai Görden <sup>1,4</sup>, Mira Tschorn <sup>5</sup>, Michael A. Rapp <sup>5</sup>, Tobias Banaschewski <sup>6</sup>, Arun L.W. Bokde <sup>7</sup>, Sylvane Desrivieres <sup>8</sup>, Herta Flor <sup>9,10</sup>, Antoine Grigis <sup>11</sup>, Hugh Garavan <sup>12</sup>, Penny Gowland <sup>13</sup>, Rüdiger Brühl <sup>14</sup>, Jean-Luc Martinot <sup>15</sup>, Marie-Laure Paillère Martinot <sup>16</sup>, Eric Artiges <sup>17</sup>, Frauke Nees <sup>6,9,26</sup>, Dimitri Papadopoulos Orfanos <sup>11</sup>, Herve Lemaitre <sup>11,18</sup>, Tomáš Paus <sup>19,20</sup>, Luise Poustka <sup>21</sup>, Juliane H. Fröhner <sup>22</sup>, Lauren Robinson <sup>23</sup>, Michael N. Smolka <sup>22</sup>, Jeanne Winterer <sup>1,24</sup>, Robert Whelan <sup>25</sup>, Gunter Schumann <sup>26</sup>, Henrik Walter <sup>1</sup>, Andreas Heinz <sup>1</sup>, Kerstin Ritter <sup>1</sup>, IMAGEN Consortium

Correspondence\*:  
Sauerbruchweg 4, 10117 Berlin, Germany  
[roshan.rane@bccn-berlin.de](mailto:roshan.rane@bccn-berlin.de)

## 2 ABSTRACT

3 Alcohol misuse during adolescence (AAM) has been linked with disruptive structural  
4 development of the brain and alcohol use disorder. Using machine learning (ML), we analyze the  
5 link between AAM phenotypes and adolescent brain structure (T1-weighted imaging and DTI)  
6 at ages 14, 19, and 22 in the IMAGEN dataset ( $n \sim 1182$ ). ML predicted AAM at age 22 from  
7 brain structure with a balanced accuracy of 78% on independent test data. Therefore, structural  
8 differences in adolescent brains could significantly predict AAM. Using brain structure at age 14  
9 and 19, ML predicted AAM at age 22 with a balanced accuracy of 73% and 75%, respectively.  
10 These results showed that structural differences preceded alcohol misuse behavior in the dataset.  
11 The most informative features were located in the white matter tracts of the corpus callosum and  
12 internal capsule, brain stem, and ventricular CSF. In the cortex, they were spread across the  
13 occipital, frontal, and temporal lobes and in the cingulate cortex. Our study also demonstrates  
14 how the choice of the phenotype for AAM, the ML method, and the confound correction technique  
15 are all crucial decisions in an exploratory ML study analyzing psychiatric disorders with weak  
16 effect sizes such as AAM.

17 **Keywords:** alcohol use disorder, adolescence alcohol misuse, magnetic resonance imaging, machine learning, confound control,  
18 psychiatric research, multivariate analysis

## 1 INTRODUCTION

19 Many adolescents participate in risky and excessive alcohol consumption behaviors [1], especially in  
20 European and North American countries. Several studies have identified that such early and risky exposure  
21 to alcohol is a potential risk factor that can lead to the development of Alcohol Use Disorder (AUD) later in  
22 life [2, 3, 4]. During adolescence and early adulthood (age 10-24), the human brain undergoes maturation  
23 characterized by an increase in white matter (WM) [5] and an initial thickening and later thinning of grey  
24 matter (GM) regions [6]. Researchers have suggested that excessive alcohol use during this period might  
25 disrupt normal brain maturation, causing lifelong effects [1, 7, 8]. Therefore, understanding how alcohol  
26 misuse during adolescence is related to the development of Alcohol Use Disorder (AUD) later in life

NOTE: This preprint reports new research that has not been certified by peer review and should not be used to guide clinical practice.

27 is crucial to understanding alcohol addiction. Furthermore, uncovering how adolescent alcohol misuse  
28 (AAM) is associated with the adolescent brain at different stages of its development can help to implement  
29 a more informed public health policy surrounding alcohol use during this age.

30 **Previous studies:** Several studies in the last two decades have attempted to uncover how adolescent  
31 alcohol misuse (AAM) and their structural brain are related. These are summarised in Table S1 in the  
32 supplementary text. Most of the earlier studies collected data from small but controlled groups of 30 to  
33 100 subjects and compared specific brain regions such as the hippocampus or the pre-frontal cortex (pFC)  
34 between adolescent alcohol misusers (AAMs) and mild users or non-users (controls). They used structural  
35 features such as regional volume [9, 10, 11], cortical thickness [12], or white matter tract volumes [13, 14].  
36 These studies found differences between the groups in regions such as the hippocampus [9, 10], cerebellum  
37 [11], and the frontal cortex [11]. However, these findings are not always consistent across studies [15].  
38 This is also evident from the highlighted texts in our literature review in Table S1. Another group of studies  
39 attempted to uncover if alcohol misuse disrupts the natural developmental trajectory of adolescent brains  
40 [16, 17, 18, 14, 19, 20]. As compared to controls, these studies reported that the brains of AAMs showed  
41 accelerated GM decline [17, 18, 19] and attenuated WM growth [17, 19]. However, brain regions reported  
42 were not consistent between these studies either and do not tell a coherent story [15] (see Table S1). These  
43 differences in findings could potentially be due to the following reasons:

- 44 1. **Heterogeneous disease with a weak effect size:** Alcohol misuse has a heterogeneous expression in  
45 the brain [21]. This heterogeneity might be driven by alcohol misuse affecting diverse brain regions  
46 in different sub-populations depending on demographic, environmental, or genetic differences [22].  
47 Furthermore, the effect of alcohol misuse on adolescent brain structure can be weak and hard to detect  
48 (especially with the mass-univariate methods used in previous studies). The possibility of several  
49 disease sub-types exasperated by the small signal-to-noise ratio can generate incoherent findings  
50 regarding which brain regions are affected by alcohol.
- 51 2. **Higher risk of false-positives:** Most previous studies have small sample size that are prone to generate  
52 inflated effect size [23]. Furthermore, these studies employ mass-univariate analysis techniques that  
53 are vulnerable to *multiple comparisons problem* [24] and can produce false-positives if ignored. These  
54 factors coupled with the possibility of publication bias to produce positive results [25] can have a high  
55 likelihood of generating false-positive findings [26].
- 56 3. **Several metrics to measure alcohol misuse:** There is no consensus on what is the best phenotype to  
57 measure AAM. Many studies use binge drinking or heavy episodic drinking as a measure of AAM  
58 [12, 27, 14, 20], while few others use a combination of binge drinking, frequency of alcohol use,  
59 amount of alcohol consumed and the age of onset of alcohol misuse [28, 18, 29, 30, 19]. These  
60 differences in the analysis could potentially produce different findings.

61 **Multivariate exploratory analysis:** Over the last years, data collection drives such as IMAGEN [31],  
62 NCANDA [32], and UK Biobank [33] made available large-sample multi-site data with  $n > 1000$  that  
63 are representative of the actual population. This enabled researchers to use multivariate, data-driven, and  
64 exploratory analysis tools such as machine learning (ML) to detect effects of alcohol misuse on multiple  
65 brain regions [27, 34, 30]. Such whole-brain multivariate methods are preferable over the previous mass-  
66 univariate methods as they have a higher sensitivity to detect true positives [35]. Furthermore, ML can be  
67 easily used for clinical applications such as computer-aided diagnosis, predicting future development of  
68 AUD, and future relapse of patients into AUD [36].

69 Due to these advantages, several exploratory studies using ML have been attempted in AUD research  
70 [27, 30, 34]. We further extend this line of work by analyzing the newly available longitudinal data from

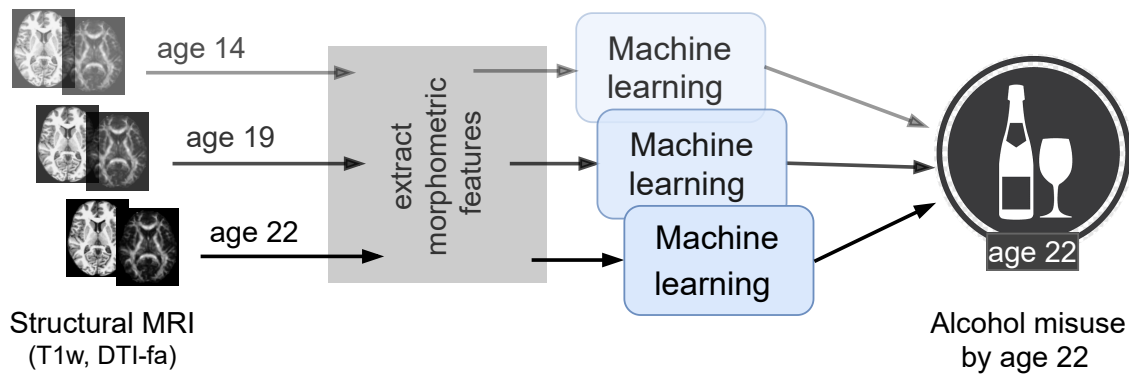

**Figure 1. An overview of the analysis performed.** Morphometric features extracted from structural brain imaging are used to predict Adolescent Alcohol Misuse (AAM) developed by the age of 22 using machine learning. To understand the causal relationship between AAM and the brain, three separate analyses are performed by using imaging data collected at three stages of adolescence: age 14, age 19 and age 22

71 IMAGEN ( $n \sim 1182$  at 4 time points of adolescence) [31] by designing a robust and reliable ML pipeline.  
72 The goal of this study is to explore the relationship between adolescent brain and AAM using ML on  
73 a relatively large ( $n \geq 1000$ ), multi-site adolescent data and discover the brain regions associated with  
74 AAM. As shown in Figure 1, we predict AAM at age 22 using brain morphometrics derived from structural  
75 imaging captured from three stages of adolescence – ages 14, 19, and 22. The structural features of different  
76 brain regions are extracted from two modalities of structural MRI, that is, T1-weighted imaging (T1w) and  
77 Diffusion Tensor Imaging (DTI). The most informative structural features for the ML model prediction  
78 are visualized using SHAP [37, 38] that reveals the most distinct structural brain differences between  
79 AAMs and controls. Furthermore, we use multiple phenotypes of alcohol misuse such as the frequency  
80 of alcohol consumption, amount of consumption, onset of misuse, binge drinking, the AUDIT score, and  
81 other combinations, and systematically compare them. We also compare four different ML models, and  
82 multiple methods of controlling for confounds in ML and derive important methodological insights which  
83 are beneficial for reliably applying ML to psychiatric disorders such as AUD. To promote reproducibility  
84 and open science, the entire codebase used in this study, including the initial data analysis performed on  
85 the IMAGEN dataset are made available at [https://github.com/RoshanRane/imagen\\_ml](https://github.com/RoshanRane/imagen_ml).

## 2 DATA

86 The IMAGEN dataset [31, 39] is currently one of the best candidates for studying the effects of alcohol  
87 misuse on the adolescent brain. Most large-sample studies listed in Table S1 [27, 29, 30] used the IMAGEN  
88 dataset for their analysis. It consists of data collected from over 2000 young people and includes information  
89 such as brain neuroimaging, genomics, cognitive and behavioral assessments, and self-report questionnaires  
90 related to alcohol use and other drug use. The data was collected from 8 recruitment centers across Europe,  
91 at 4 successive time points of adolescence and youth. Figure 2 (a) shows the number of subjects at each  
92 time point and the number of participants that were scanned. Subjects were not scanned in FU1. More  
93 details regarding recruitment of subjects, acquisition of psychosocial measures, and ethics can be found on  
94 the IMAGEN project website<sup>1</sup>.

95 **Structural neuroimaging data:** To investigate the effects of alcohol on brain structure, two MRI  
96 modalities have been used predominantly in the literature - (a) T1-weighted imaging (T1w), and (b)

<sup>1</sup> <https://imagen-europe.com/standard-operating-procedures>

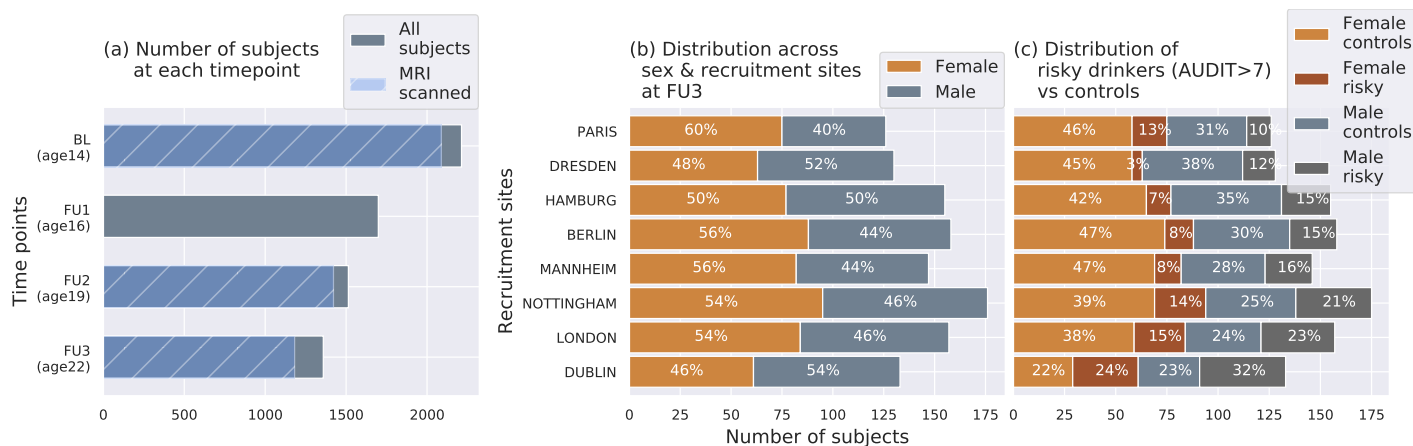

**Figure 2. The IMAGEN dataset:** (a) Data is collected longitudinally at 4 stages of adolescence - age 14 or baseline (BL), age 16 or follow-up 1 (FU1), age 19 or follow-up 2 (FU2) and, finally age 22 or follow-up 3 (FU3). The blue bar shows the number of subjects with brain imaging data. (b) The distribution of subjects across sex and the site of recruitment, for the 1182 subjects that were scanned at FU3 (c) The same distribution across sex and site also showing the proportion of subjects that meet the AUDIT 'risky drinkers' category at FU3.

97 Diffusion Tensor Imaging (DTI) (see Table S1). While T1w MRI can be used to derive general features  
 98 of the brain structure such as cortical and sub-cortical volumes, areas, and gray-matter thicknesses, DTI  
 99 captures white matter microstructures by probing water molecule motion. An axial slice ( $z = 80$ ) of both  
 100 of these MRI modalities of a control subject from the IMAGEN data are shown in Figure 3.

101 Both modalities were recorded using 3-Tesla scanners. The T1w images were collected using sequences  
 102 based on the ADNI protocol [40]. The IMAGEN consortium used Freesurfer's *recon-all* pipeline  
 103 to process these images and extract structural features. This involves registering the T1w-images to the  
 104 Talairach template brain, automatic extraction of gray matter, white matter and cerebrospinal fluid (CSF)  
 105 sections, and then segmenting them into 34 cortical regions per hemisphere and 45 sub-cortical regions. The  
 106 grey matter volume (in  $\text{mm}^3$ ), surface area (in  $\text{mm}^2$ ), thickness (in mm), and surface curvature, are  
 107 extracted for each of the cortical regions using the Desikan-Killiany atlas, along with global features such  
 108 as total intracranial, total grey matter, white matter and CSF volumes. For the subcortical regions, the mean  
 109 intensity and volume are determined. This results in a total of 656 structural features per subject. DTI  
 110 scans were acquired using the protocol described in Jones et al. [41] and Fractional Anisotropy (FA) is  
 111 derived from the DTI using FMRIB's Diffusion Toolbox FDT. The DTI-FA images are then non-linearly  
 112 registered to the MNI152 space ( $1\text{mm}^3$ ) and the average FA intensity at 63 regions with white matter tracts  
 113 are calculated using the TBSS toolbox [42] by the IMAGEN consortium<sup>2</sup>. Subjects with FA intensity  
 114 greater than 3 standard deviations from the mean are excluded as outliers.

115 **Alcohol misuse phenotypes:** Information related to alcohol use and misuse can be found in the AUDIT  
 116 screening test<sup>3</sup> (Alcohol Use Disorder Identification Test), ESPAD questionnaire (European School Survey  
 117 Project on Alcohol and other Drug), and the TLFb logs (Timeline-Followback Interview). Previous studies  
 118 used different metrics of alcohol misuse such as the number of binge drinking episodes [12, 27, 14, 20],  
 119 the frequency and amount of alcohol consumption [28, 18, 29, 30, 19], and even the age of onset of alcohol  
 120 misuse [43] to characterize AAM. There has not yet been a systematic comparison of these different  
 121 phenotypes.

<sup>2</sup> [https://github.com/imagen2/imagen-processing/tree/master/fsl\\_dti](https://github.com/imagen2/imagen-processing/tree/master/fsl_dti)

<sup>3</sup> AUDIT questionnaire (link)

122 In this paper, we use four alcohol misuse metrics to derive ten phenotypes of AAM, (a) frequency of  
123 alcohol use, (b) amount of alcohol consumed per drinking occasion, (c) year of onset of alcohol misuse,  
124 and (d) the number of binge drinking episodes. These phenotypes are listed in Table 1 and include each  
125 of the individual metrics, their combinations, and their longitudinal trajectories from age 14 to 22. The  
126 longitudinal phenotypes, ‘Binge-growth’ and ‘AUDIT-growth’, are generated using latent growth curve  
127 models [44] to capture the alcohol misuse trajectory over the four time points - BL, FU1, FU2, and FU3.  
128 To derive the AAMs group and the controls from each alcohol misuse metric, a standard procedure is  
129 followed that is similar to Seo et al. [30] and Ruan et al. [43]. First, the phenotype is used to categorize the  
130 subjects into three stages of alcohol misuse severity - heavy AAMs, moderate misusers, and safe users.  
131 Moderate misusers are then excluded from the analysis ( $\approx 250 - 400$  subjects) and ML classification  
132 is performed with heavy misusers as AAMs and safe users as controls. Figure S2 and Table S2 in the  
133 supplement shows how the subjects are divided into these three sub-groups for each of the 10 phenotype  
134 and also lists the final number of subjects in each sub-group in the FU3 analysis, as an example. The data  
135 analysis procedure can be found in the project code repository<sup>4</sup> within the *dataset-statistics* notebook.  
136 **Confounds in the dataset:** Diagram (c) in Figure 2 shows how the proportion of risky alcohol users varies  
137 across the 8 recruitment sites and among the male and female subsets at each site within the dataset. For  
138 example, a greater portion of subjects from sites like Dublin, London, and Nottingham indulge in risky  
139 alcohol use compared to the sites from mainland Europe. Similarly, at most sites, a greater portion of males  
140 are risky alcohol users compared to females. These systematic differences can confound ML analyses since  
141 ML models can use the sex and site information present in the neuroimaging data to indirectly predict  
142 AAM, instead of identifying alcohol-related effects in the brain structure. This problem of confounds in  
143 multivariate analysis [45, 46, 47] and the methods used to control for its effects are explained in further  
144 detail in the next section.

### 3 METHODS

145 Three time point analyses are performed in this study. Each time point analysis is divided into two stages  
146 called the *ML exploration* stage and the *generalization test* stage. The ML exploration is performed with  
147 80% of data (randomly sampled). The remaining 20% ( $n = 147$ ) serve as an independent test data, called  
148 the  $data_{holdout}$ , which is only used once, in the end, to perform the final inference and report the results.  
149 This design allows us to first determine the best ML algorithm for the task and the best phenotype of AAM,  
150 and then test the results on an independent subset of the data. The pseudocode of this procedure is also  
151 provided in the supplementary section 4. It was implemented with the help of python’s *scikit-learn* software  
152 package<sup>5</sup>. The two-stage cross validation (CV) with a inner n-fold cross validation (CV) procedure is  
153 designed to prevent ‘double dipping’ [48, 49]. All data preprocessing and analysis is executed only on the  
154 training data in  $data_{explore}$ , and only applied on the test data during validation. This ensures that there are  
155 no data leakage issues that were found in several previous ML neuroimaging studies [50].

156

157 **MRI features:** The 656 morphometric features extracted from T1w sMRI modality and the 63 features  
158 extracted from the DTI-FA modality are used together as the input for the ML models at both stages. Each  
159 feature is standardized to have zero mean and unit variance across all subjects (mean and variance are  
160 estimated only on the training data, and then applied to the test data). Features with zero variance are  
161 dropped.

162 **ML models:** Four ML models are tested in this study. These include logistic regression (LR), linear

---

<sup>4</sup> [https://github.com/RoshanRane/ML\\_for\\_IMAGEN](https://github.com/RoshanRane/ML_for_IMAGEN)

<sup>5</sup> <https://scikit-learn.org/stable/about.html>

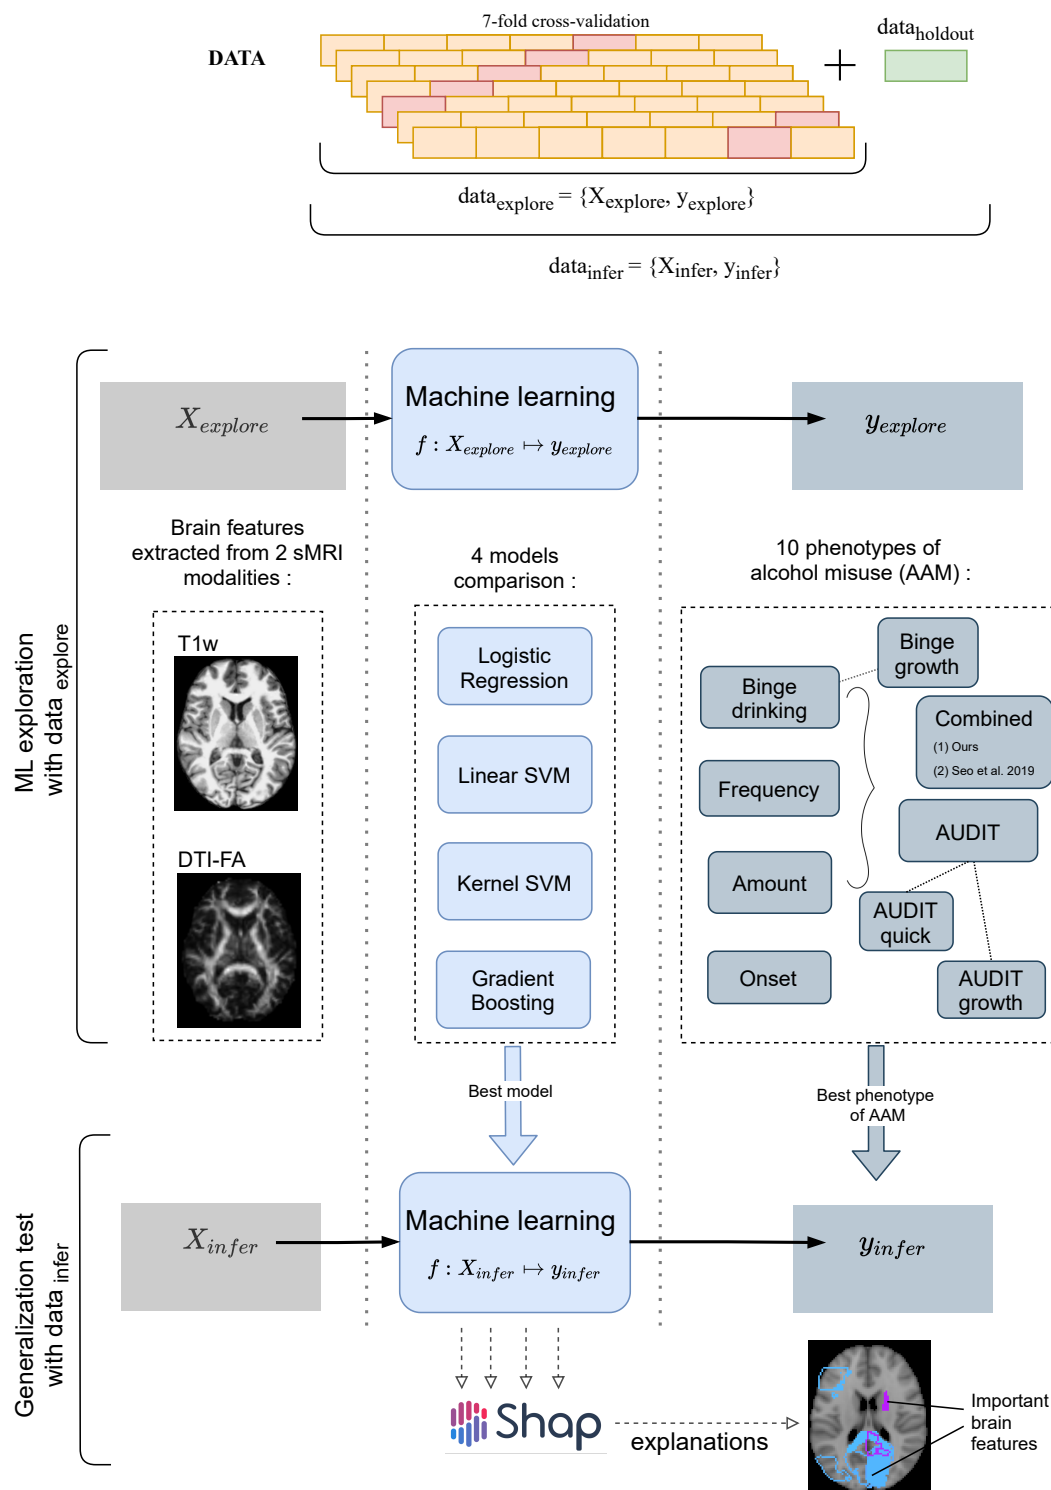

**Figure 3. A schematic representation of the experimental procedure** followed for all 3 time point analyses. In the ML exploration stage, we experiment with four ML models and 10 phenotypes of AAM on 80% of the data ( $data_{explore}$ ) using a 7-fold cross validation scheme. Once the best ML model, the best phenotype of AAM, and the most appropriate confound-control technique are determined, the *generalization test* is performed on  $data_{infer}$  by using the  $data_{holdout}$  subset as the test data. The result from the generalization test are reported as the final results and the informative brain features are determined at this stage using SHAP [37].

**Table 1. 10 phenotypes of Adolescent Alcohol Misuse (AAM)** are derived and compared in this analysis. A description of each phenotype is provided here along with the link to the IMAGEN questionnaires ID used to generate the phenotype.

| No. | Phenotype     | Description                                                                                                         | Questionnaire                                       |
|-----|---------------|---------------------------------------------------------------------------------------------------------------------|-----------------------------------------------------|
| 1   | Frequency     | Number of occasions drinking alcohol in last 12 months                                                              | ESPAD 8b.                                           |
| 2   | Amount        | Number of alcohol drinks consumed on a typical drinking occasion                                                    | ESPAD prev31, AUDIT q2.                             |
| 3   | Onset         | Had one or more binge-drinking experiences by the age of 14                                                         | ESPAD 29d                                           |
| 4   | Binge         | Total drunk episodes from binge-drinking in lifetime (by age 22)                                                    | ESPAD 19a, AUDIT q3.                                |
| 5   | Binge-growth  | Longitudinal trajectory of binge-drinking experiences had per year                                                  | Growth curve of ESPAD 19b.                          |
| 6   | AUDIT         | AUDIT screening test performed at the year of scan                                                                  | AUDIT-total (q1-10).                                |
| 7   | AUDIT-quick   | Only the first 3 questions of AUDIT screening test                                                                  | AUDIT-freq (q1-3).                                  |
| 8   | AUDIT-growth  | Longitudinal changes in the AUDIT score measured over the years                                                     | Growth curve of AUDIT-total.                        |
| 9   | Combined-seo  | A combined risky-drinking phenotype from Seo et al. [30] generated using amount, frequency, and binge-drinking data | ESPAD 8b, 17b, 19b, and TLFB alcohol2               |
| 10  | Combined-ours | A combined risky-drinking phenotype developed by clustering amount, frequency, and binge-drinking trajectory        | AUDIT q1, q2, ESPAD 19a, growth curve of ESPAD 19b. |

163 SVM (SVM-lin) [51], kernel SVM with a radial basis function (KSVM-rbf) [52], and a gradient boosting  
 164 (GB) classifier [53]. LR and SVM-lin are linear ML methods, whereas SVM-rbf and GB are capable of  
 165 learning non-linear mappings. We use the liblinear [54] implementation of SVM-lin and XGBoost [55]  
 166 implementation of GB. GB is an ensemble learning method. The hyperparameters of the models are listed  
 167 in the supplementary section 3 are tuned using an inner-CV. Testing 4 different ML models helps to account  
 168 for any modeling-related bias [56] in the final results. Combining the 4 ML models and the ten different  
 169 phenotypes of AAM, we end up with a total of 40 ML classification runs in the ML exploration stage.

170 **Evaluation metrics:** The model performance is evaluated using the *balanced accuracy* metric [57]. It is  
 171 formulated as the mean of the model's accuracies for each class (AAM and controls) in the classification.  
 172 Therefore, it is insensitive to class imbalances in the data. Along with this, the area under the curve of the  
 173 receiver-operator characteristic (AUC-ROC) is also calculated. In ML exploratory stage, 7 measures are  
 174 obtained for each metric from the outer 7-fold CV which helps to estimate mean of the model performance  
 175 and get a sense of the variance [58]. During generalization test, the ML models are retrained 7 times  
 176 on  $data_{explore}$  with different random seeds and reevaluated on  $data_{holdout}$  to gain an estimate of the  
 177 model performance on  $data_{holdout}$ . The statistical significance of the final generalization test accuracies  
 178 is calculated using permutation testing [59]. The permutation test is performed by running the entire ML  
 179 pipeline with randomly shuffled labels in the training data, while keeping the labels in the test data fixed.  
 180 This is repeated 1000 times to generate the null-hypothesis ( $H_0$ ) distribution and derive the p-value. Since  
 181 three time point analyses are performed on the same subjects, Bonferroni correction is applied on the  
 182 p-values to control for the false-positive rate from this multiple comparison.

183 **Model interpretation:** The associations learned by the ML models between structural brain features and

184 AAM is extracted using a post-hoc feature importance attribution technique called SHAP [37]. SHAP  
185 (SHapley Additive exPlanations) uses the concept of *Shapley Values* from cooperative game theory to fairly  
186 determine the marginal contribution of each input feature to model prediction [37].  
187 Following the generalization test, a SHAP value ( $S_{s,f}$ ) is generated for each input feature  $f$  of each subject  
188  $s$  in  $\text{data}_{\text{holdout}}$ . The goal is to determine which of the 719 features were most informative for the model  
189 when classifying AAMs from controls. Feature importance can be determined by looking at the average  
190 absolute SHAP value of each feature across all subjects  $\overline{S}_f = \frac{1}{N} \sum_{s=1}^N |S_{s,f}|$ , where  $N$  denotes the total  
191 subjects in  $\text{data}_{\text{holdout}}$ . The most significant features are chosen as those features that have  $\overline{S}_f$  value at  
192 least two times higher than the average SHAP value across all the features  $\overline{S} = \frac{1}{719} \sum_{f=1}^{719} \overline{S}_f$ . Since the  
193 generalization test is repeated seven times with different random seeds, we have seven instances of  $\overline{S}_f$   
194 available. Only those features that consistently have  $\overline{S}_f \geq 2 * \overline{S}$  across all seven runs are listed as the  
195 most informative features. Next, it is determined if these informative features have higher-than-average  
196 or lower-than-average values when predicted as AAM. This information is further relevant for deriving  
197 clinical insights about how AAM brain structure differs from controls.

198 **Correcting for confounds** In ML, a confounding variable  $c$  is defined as a variable that correlate with  
199 the target  $y$  and is deducible from the input  $X$ , and this relationship  $X \rightarrow c \rightarrow y$  is not of primary  
200 interest to the research question and hinders the analysis [47]. As demonstrated by the diagram on  
201 the right, a confounding variable  $c$  can form an alternative explanation for the relationship between  
202  $X$  and  $y$  and distract the ML models from detecting the signal of interest  $s_y$  between  $X \rightarrow y$ .  
203 In this study, the sex of the subjects and their site of recruitment can confound  
204 the AAM analysis [30] since they correlate with the output AAM labels and  
205 are predictable from the input structural brain features. Instead of detecting  
206 the effects of alcohol misuse in the brain  $s_y$ , the ML models could potentially  
207 use the information about the confounds  $s_c$  to predict AAM along the alternative  
208 pathway (shown with the red dotted lines) and produce significant but confounding  
209 results [30, 47, 60]. In neuroimaging studies, two methods have been extensively  
210 employed for correcting the influence of confounds:

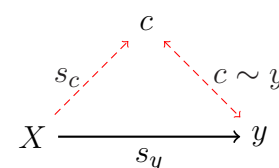

- 211 1. *Confound regression*: In this method, the influence of the confounding signal  $s_c$  on  $X$  is controlled  
212 by regressing out the signal from features in  $X$  [45]. This can remove the alternative confounding  
213 explanation pathway by eliminating the link  $s_c$  between  $X \rightarrow c$ .
- 214 2. *Post hoc counterbalancing*: The correlation between the confound and the output  $c \sim y$  can be removed  
215 by resampling the data after the data collection. This method potentially removes the alternative  
216 confounding pathway by abolishing the relationship  $c \rightarrow y$  [45]. The resampling is performed such  
217 that the distribution of the values of the confounding variable  $c$  is similar across all classes of  $y$  (AAM  
218 and controls). So for example, after counterbalancing for sex in this study, the ratio of male-to-female  
219 subjects should be the same in AAMs and controls. One common technique of counterbalancing  
220 for categorical confounds (eg. sex, site) involves randomly dropping some samples from the larger  
221 classes in  $y$  until they are equal. This is called counterbalancing *with undersampling*. However, this  
222 will result in a reduction in the sample size and hence the statistical power of the study. Another  
223 way to counterbalance without losing samples involves performing *sampling-with-replacement* on the  
224 smaller classes in  $y$ . This is called counterbalancing *with oversampling*. One should take care that the  
225 sampling-with-replacement is done only on the training data, after the train-test split is performed.

226 To assess whether confound regression worked and the confounding signal  $s_c$  is removed successfully, a  
227 confound correction method recently proposed by Snoek et al. [47] can be used. In this method, the ML  
228 algorithm used in the original analysis is reused to predict the confound  $c$  from the neuroimaging data



229  $X$ . Following a successful confound regression, the confound should not be predictable anymore from  $X$   
230 and  $X \rightarrow c$  should produce insignificant or chance accuracy. Similarly, to determine if counterbalancing  
231 was successful and the correlation  $c \sim y$  was removed, we used the *Same Analysis Approach* by G3rger  
232 et al. [46]. Here, the same ML algorithm is used to predict the confound  $c$  from the labels  $y$  [46]. An  
233 above-chance significant prediction accuracy between  $c \rightarrow y$  would indicate that the correlation  $c \sim y$   
234 still exists and the counterbalancing was not successful. Since the confounds  $c_{sex}$  and  $c_{site}$  are categorical,  
235 they are first one-hot encoded to ensure no false ordinal relationship is implied. The confound correction  
236 methods are only performed on the training data as recommended by Snoek et al. [47]. The balanced  
237 accuracy metric used ensures that we account for any class imbalances in the test data. Before starting  
238 the ML exploration, we first compare these different confound correction methods and choose the most  
239 suitable method among them.

## 4 RESULTS

240 The results are reported in the following four subsections: In subsection 1, different confound-control  
241 techniques are compared and the most suitable technique for this study is determined. Subsection 2 shows  
242 the results of the ML exploration performed with ten AAM labels, four ML models, and using imaging  
243 data from three time points of adolescence. This stage helps to determine the best phenotype of AAM and  
244 the best ML model. Subsection 3 reports the final results on the independent data<sub>holdout</sub> for all three time  
245 point analyses and subsection 4 shows the most informative features found in each of the analyses.

### 246 Confound correction techniques

247 The sex  $c_{sex}$  and recruitment site  $c_{site}$  of subjects confound this study (see section 2) and their influence  
248 on the study needs to be controlled. We test three confound correction techniques on data<sub>explore</sub> – (a)  
249 confound regression (b) counterbalancing with undersampling and (c) counterbalancing with oversampling.  
250 To verify if these methods work as expected, the *same analysis approach* from G3rger et al. [46] and  
251 the approach by Snoek et al. [47] are employed. For the two confounds  $c_{sex}$  and  $c_{site}$ , this requires us to  
252 test five input-output combinations ( $X \rightarrow y$ ,  $X \rightarrow c_{sex}$ ,  $X \rightarrow c_{site}$ ,  $c_{sex} \rightarrow y$  and  $c_{site} \rightarrow y$ ) for a given  
253  $X \rightarrow y$  analysis.

254 Figure 4 shows the results of comparing different confound correction techniques for the ‘Binge’  
255 phenotype. The following conclusions can be derived from this comparison:

- 256 1. Sex and site can confound the AAM analysis: As shown in subplot (a), all the input-output combinations  
257 involving the confounds ( $X \rightarrow c_{sex}$ ,  $X \rightarrow c_{site}$ ,  $c_{sex} \rightarrow y$  and  $c_{site} \rightarrow y$ ) produce significant  
258 prediction accuracies before any confound correction is performed. This further adds to the evidence  
259 that both the confounds  $c_{sex}$ ,  $c_{site}$  can strongly influence the accuracy of the main analysis  $X \rightarrow y$  and  
260 confound the analysis.
- 261 2. Confound regression is not a good choice when followed by a non-linear ML method: Following  
262 confound regression, the results of  $X \rightarrow c_{sex}$  and  $X \rightarrow c_{site}$  should become non-significant as the  
263 signal  $s_c$  has been removed from  $X$ . However, it is seen that in some cases the non-linear models  
264 SVM-rbf and GB are capable of detecting the confounding signal  $s_c$  from the imaging data. The red  
265 arrow in the subplot (b) points out one such case in the example shown. This is not surprising as the  
266 standard confound regression removes linear components of the signal  $s_c$  but does not remove any  
267 non-linear components that might still be present in  $X$  [46, 60]. Furthermore, confound regression  
268 carries an additional risk of also regressing-out the useful signal in  $X$  that does not confound the  
269 analysis  $X \rightarrow y$  but is a co-variate of both  $c$  and  $y$  [60].

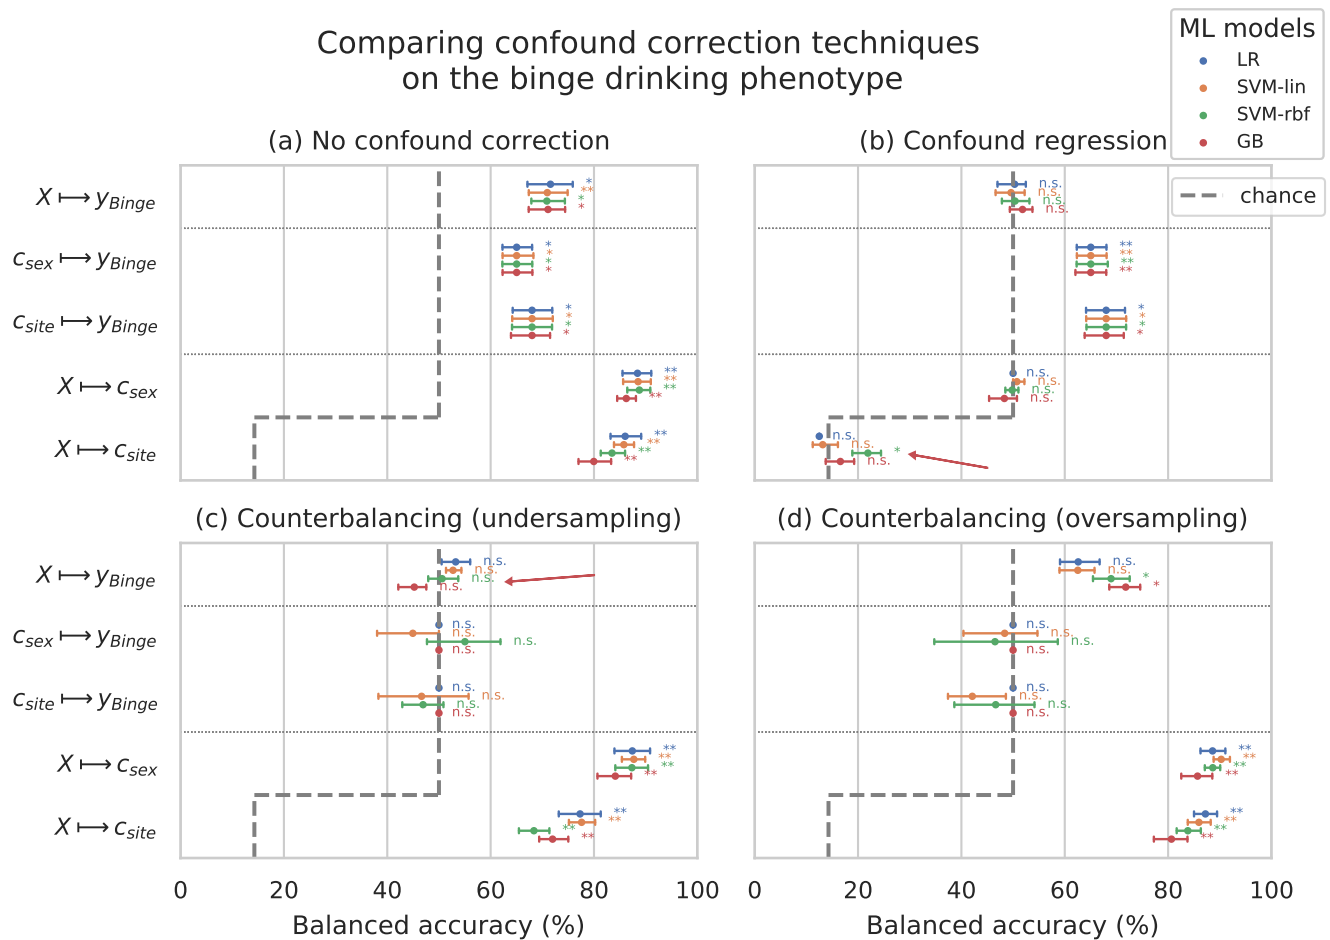

**Figure 4. Comparing confound correction techniques.** Five input-output settings are compared within each confound correction technique:  $X \rightarrow y$ ,  $X \rightarrow c_{sex}$ ,  $X \rightarrow c_{site}$ ,  $c_{sex} \rightarrow y$ , and  $c_{site} \rightarrow y$ . (a) shows the results before any correction is performed, (b) shows the results of performing confound regression, and (c) and (d) show the results from counterbalancing by undersampling the majority class and oversampling the minority class, respectively. Statistical significance is obtained from 1000 permutation tests and is shown with \*\* if  $p < 0.01$ , \* if  $p < 0.05$ , and 'n.s' if  $p \geq 0.05$ .

270 3. Counterbalancing with oversampling is the best choice for this study: As expected, counterbalancing  
 271 forces the  $c_{sex} \rightarrow y$  and  $c_{site} \rightarrow y$  accuracies to chance-level by removing the correlation between  
 272  $c \sim y$  (subplots (c) and (d)). It can be seen that after the undersampled counterbalancing the results  
 273 of the main analysis  $X \rightarrow y$  also become non-significant as indicated by the red arrow in (c). This  
 274 drastic reduction in performance is likely due to the reduction in the sample size of the training data by  
 275  $n \sim 100 - 250$  from undersampling. Therefore, counterbalancing with oversampling of the minority  
 276 group is a better alternative compared to undersampling.

277 This comparison was also repeated for two other AAM phenotypes - 'Combined-seo' and 'Binge-growth'  
 278 and the above findings were found to be consistent across all of them. Hence, counterbalancing with  
 279 oversampling is used as the confound-control technique in the main analysis. When performing over-  
 280 sampled counterbalancing, it is ensured that the oversampling is done only for the training data.

## 281 ML exploration

282 The results from the ML exploration experiments are summarised in Figure 5. For the different AAM  
 283 phenotypes, the balanced accuracies range between 45 – 73%. It must be noted that the results across

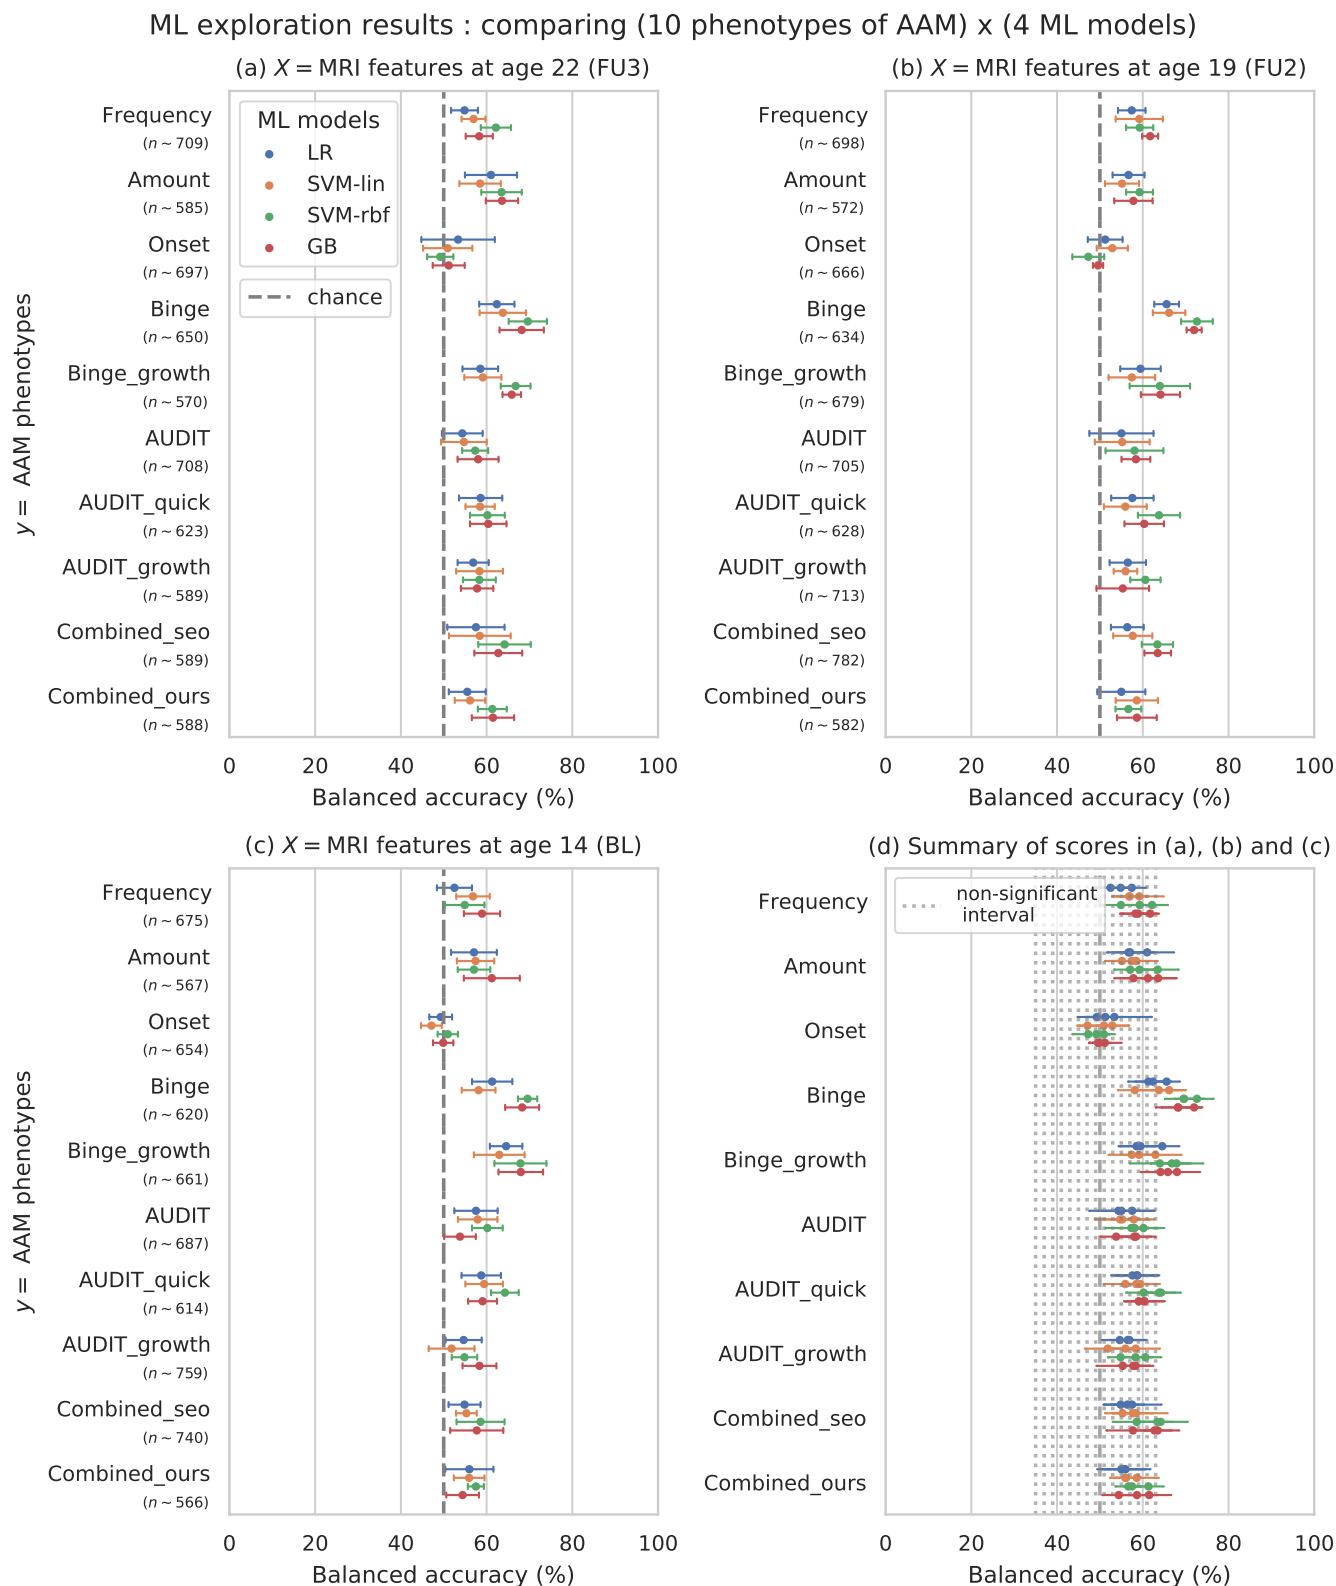

**Figure 5. Results of the ML exploration experiments:** The ten phenotypes of AAM tested are listed on the y-axis and the four ML models are represented with different color coding as shown in the legend of figure (a). For a given AAM label and ML model, the point represents the mean balanced accuracy across the 7-fold CV and the bars represent its standard deviation. Figure (a) shows the results when the imaging data from age 22 (FU3) is used, figure (b) shows results for age 19 (FU2) and figure (c) for age 14. Figure (d) shows the results from all three time point analyses in a single plot along with the interval of the balanced accuracy that were non-significant ( $p \leq 0.05$ ) when tested with permutation tests.

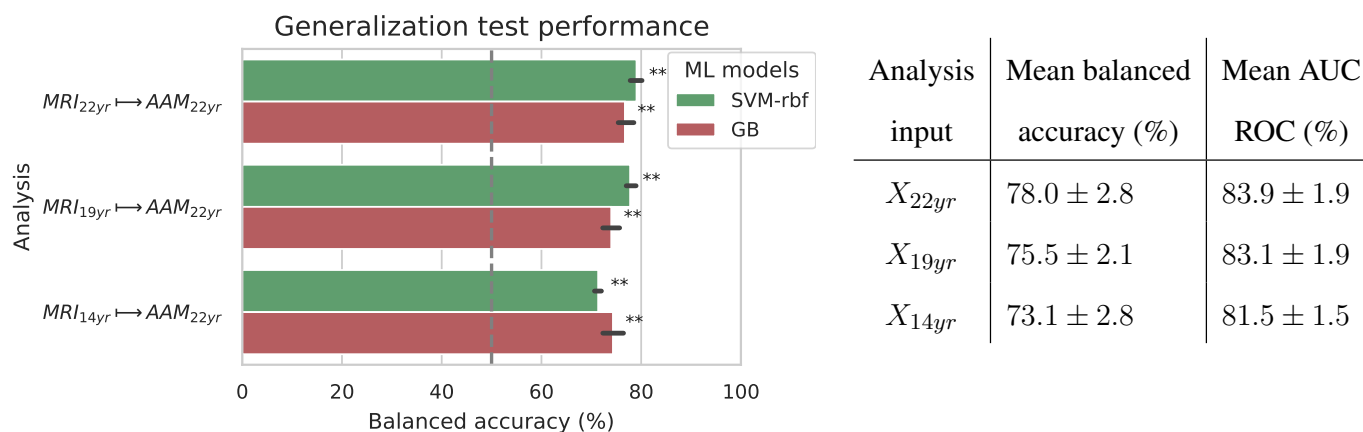

**Figure 6 & Table 2. Final results** for the three time point analyses on the ‘Binge’ drinking AAM phenotype obtained with the two non-linear ML models, kernel-based support vector machine (SVM-rbf) and gradient boosting (GB). The figure shows the mean balanced accuracy achieved by each ML model within each analysis while the table lists the combined average scores for each analysis. The ML models are retrained 7 times on data<sub>explore</sub> with different random seeds and evaluated on data<sub>holdout</sub> to obtain an estimate of the accuracy with a standard deviation. Statistical significance is obtained from 1000 permutation tests and is shown with \*\* if  $p < 0.01$ , \* if  $p < 0.05$ , and ‘n.s’ if  $p \geq 0.05$ .

284 different phenotypes are not directly comparable as each AAM phenotype classification task has a different  
 285 sample size varying between  $\approx 620 - 780$ . These differences in the number of samples (see Table S2  
 286 in the supplement) in the two classes AAM and controls could add additional variance in the accuracy.  
 287 Nevertheless, some useful observations can be made from the consistencies across the three time point  
 288 analyses in subplots (a), (b) and (c):

- 289 1. The most predictable phenotype from structural brain features for all three time point analyses is  
 290 ‘Binge’ which measures the total lifetime experiences of being drunk from binge drinking.
- 291 2. Other individual phenotypes such as the amount of alcohol consumption (Amount), frequency of  
 292 alcohol use (Frequency) and the age of AAM onset (Onset) are harder to predict from brain features  
 293 compared to the binge drinking phenotype. The results on ‘Combined-seo’ and ‘Combined-ours’ shows  
 294 that using these phenotypes in combination with binge drinking seems to also be detrimental to model  
 295 performance.
- 296 3. All models perform poorly at predicting AAM phenotypes derived from AUDIT. This is surprising as  
 297 AUDIT is considered a *de-facto* screening test for measuring alcohol misuse [61].
- 298 4. Among the four ML models, the SVM with non-linear kernel SVM-rbf, and the ensemble learning  
 299 method GB perform better than the linear models LR and SVM-lin. This is further evident in the  
 300 summary plot (d) in the figure.

301 In summary, the non-linear ML models SVM-rbf and GB coupled with the ‘Binge’ phenotype consistently  
 302 perform the best in all three time point analyses. This is more clearly visible in the summary figure (d)  
 303 where the results from all three analyses are combined in a single plot. Similar general observations can be  
 304 made when the AUC-ROC metric is used to measure model performance as shown in the supplementary  
 305 Figure S3.

### 306 Generalization

307 The generalization test is performed with ‘Binge’ phenotype as the label and the two non-linear ML  
 308 models, SVM-rbf and GB. The final results are shown in Figure 6. For the three analyses using imaging

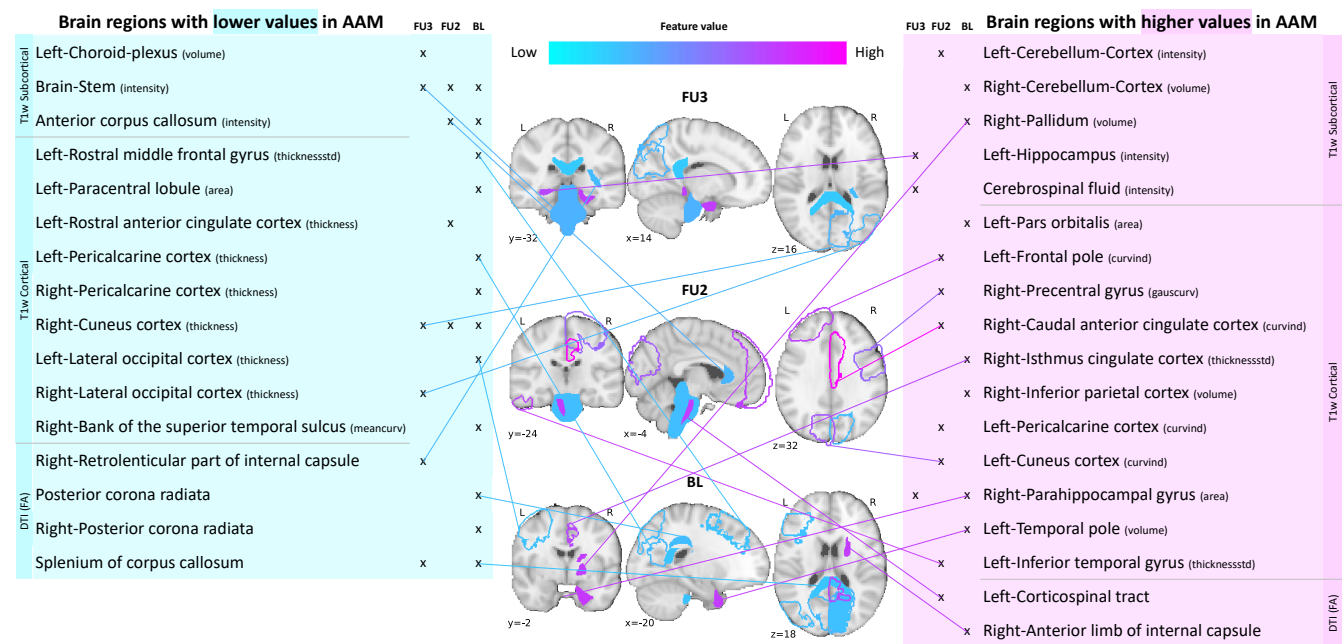

**Figure 7. Most informative structural features** for SVM-rbf model's predictions on data<sub>holdout</sub>. All important features are listed and their locations are shown on a template brain for a better intuition for each of the three time point analyses. The features are color coded to also display whether these features have lower-than-average or higher-than-average values when the model predicts alcohol misusers. (Acronyms:: AAM: adolescence alcohol misuse, area: surface area, volume: gray matter volume, thickness: average thickness, thicknessstd: standard deviation of thickness, intensity: mean intensity, meancurv: integrated rectified mean curvature, gauscurv: integrated rectified gaussian curvature, curvind: intrinsic curvature index)

309 data from age 22, age 19, and age 14, as input, an average balanced accuracy of 78%, 75.5%, and 73.1%  
 310 are achieved, respectively. Their average ROC-AUC scores are 83.9%, 83.1%, and 81.5% for the respective  
 311 analyses. The accuracies for all three time point analyses are significant with  $p < 0.01$ . To get a better  
 312 intuition, refer to the supplementary Figure S1 that shows model accuracies versus the accuracies obtained  
 313 from permutation tests.

### 314 Important brain regions

315 Following the generalization test, the most informative structural brain features are determined for the  
 316 SVM-rbf model, as it performs relatively better among the two non-linear models tested on data<sub>holdout</sub> (see  
 317 Figure 6). Figure 7 lists the most important features for all three time point analyses and shows whether  
 318 these features have lower-than-average or higher-than-average values whenever the ML model predicts  
 319 alcohol misuse.

320 Several clusters of regions and feature values can be identified. Most of the important subcortical features  
 321 are located around the lateral ventricles and the third ventricle and include CSF-related features such as the  
 322 CSF mean-intensity, volume of left choroid plexus, and left corticospinal tract in the brain stem. Several  
 323 white matter tracts are found to be informative such as parts of the corpus callosum, internal capsule, and  
 324 posterior corona radiata. Furthermore, all of these white matter tracts, along with the brain stem have  
 325 lower-than-average intensities in AAM predictions. The prominent cortical features are spread across the  
 326 occipital, temporal, and frontal lobes. In the  $MRI_{age22} \rightarrow AAM_{age22}$  analysis important cortical features  
 327 appear in the occipital lobe. In contrast, for the future prediction analyses  $MRI_{age19} \rightarrow AAM_{age22}$  and  
 328  $MRI_{age14} \rightarrow AAM_{age22}$ , clusters appear in the limbic system (parts of the cingulate cortex and right  
 329 parahippocampal gyrus), frontal lobe (left-pars orbitalis, left-frontal pole, right-precentral gyrus, and

330 left-rostral middle frontal gyrus) as well as in the temporal lobe (left-inferior temporal gyrus, left-temporal  
331 pole, and right-bank of the superior temporal sulcus). In the occipital lobe, AAMs predictions have lower  
332 grey matter thickness in the right-cuneus, lateral occipital, and pericalcarine cortices, and higher curvature  
333 index in left-cuneus and left-pericalcarine cortex.

## 5 DISCUSSION

334 For over two decades, researchers have tried to uncover the relationship that exist between adolescent  
335 alcohol misuse (AAM) and brain development. Many previous studies found that such a relationship  
336 exists (see Table S1) but with low-to-medium effect size [10, 27, 34, 30, 11, 13, 17]. The brain regions  
337 linked with AAM varied greatly across studies (see highlighted text in Table S1). This inconsistency in  
338 findings and effect sizes could be due to methodological limitations, small sample studies, unavailability of  
339 long-term longitudinal data like IMAGEN [31], or simply due to the heterogeneous expression of AAM in  
340 the brain. In our study, ML models predicted AAM with significantly above-chance accuracies in the range  
341 73.1% – 78% (ROC-AUC in 81.5% – 83.9%) from adolescent brain structure captured at ages 14, 19 and  
342 22. Thus, our results demonstrate that adolescent brain structure is indeed associated with alcohol misuse  
343 during this period.

344 The causality of the relationship between adolescent brain structure and AAM is not clear [27, 20]. The  
345 relationship could arise from alcohol misuse inducing neurotoxicity [21] causing the observed changes  
346 in their brains. It could also be that these structural differences precede AAM and such adolescents are  
347 just more vulnerable towards alcohol misuse [8, 62]. Such neuropsychological predisposition could stem  
348 from genetic predispositions or from influencing environmental factors such as early stress or childhood  
349 trauma [63, 64], misuse of other drugs such as cannabis [65] and tobacco, and parental drug misuse [14].  
350 There might also be an interaction effect between alcohol-induced neurotoxicity and environmental and  
351 genetic predispositions [20]. While the direction of causality is still under active investigation [20, 66],  
352 the significantly high accuracies obtained in our study for  $MRI_{age19} \rightarrow AAM_{age22}$  and especially  
353  $MRI_{age14} \rightarrow AAM_{age22}$  suggest that these structural differences might be preceding alcohol misuse  
354 behavior. Out of the 265 subjects that took the ESPAD survey at age 14 and belonged to the AAM category  
355 in  $MRI_{age14} \rightarrow AAM_{age22}$  analysis, 83.3% of subjects reported having no or just one binge drinking  
356 experience until age 14. This supports the results from Robert et al. [20] that a cerebral predisposition - be  
357 it due to genetic or environmental effects - might be preceding alcohol abuse in adolescents.

358 We identified the most informative brain features for the ML predictions using SHAP that has been  
359 successfully applied to medical data [37, 38]. The important features were found to be distributed across  
360 several subcortical and cortical regions of the brain, implying that the association between AAM and brain  
361 structure is widespread and heterogeneous. In accordance with previous studies, AAM was associated with  
362 lower DTI-FA intensities in several white matter tracts and the brain stem [13, 16, 15] and reduced GM  
363 thickness [34, 18], especially in the occipital lobe. Features of anterior cingulate cortex [34, 30, 15], middle  
364 frontal and precentral gyrus [17], hippocampus [9, 10], and right parahippocampal gyrus [27] were also  
365 found to be informative, although the type of feature and the average feature value in AAMs differed from  
366 previous studies. Features from the frontal lobe and cerebellum were informative only for future AAM [14]  
367 but not for current AAM prediction, in contrast to findings of [11, 27, 30]. This difference could be due  
368 to the meticulous confound control performed in this study for sex and site of the subjects. Additionally,  
369 our ML models also found CSF-related features in the third and lateral ventricles, and some regions of the  
370 temporal cortex as informative features for AAM prediction.

371 In the ML exploration stage, we found that the binge drinking phenotype, which is commonly used in  
372 previous studies [10, 27, 20], was the most predictable phenotype of AAM as compared to frequency,

373 amount, or onset of alcohol misuse. Curiously, phenotypes derived from AUDIT, which is a gold standard  
374 of screening for alcohol misuse [61], did not score significantly above-chance in any of the three time point  
375 analyses. Other similar compound metrics that use measures of alcohol use frequency and amount along  
376 with binge drinking, such as ‘Combined-seo’ and ‘Combined-ours’, also perform worse than using just the  
377 binge drinking information. This suggests that using other phenotypes of alcohol misuse in combination  
378 with binge drinking was detrimental to the prediction task, as compared to using only binge drinking.  
379 Different phenotypes of AAM capture slightly different psychosocial characteristics of adolescents [67].  
380 For instance, ‘Amount’ correlates significantly with agreeableness and a life history of relocation valence  
381 ( $r = -0.14$ ,  $p < 0.001$ ), accident valence ( $r = -0.16$ ,  $p < 0.001$ ) and sexuality frequency ( $r = -0.17$ ,  
382  $p < 0.001$ ), whereas the other phenotypes do not ( $p > 0.01$ ). ‘AUDIT’ and its derivatives significantly  
383 correlate with impulsivity trait ( $r = 0.23$ ,  $p < 0.001$ ) on SURPS, where as ‘Binge’ does not ( $r = 0.09$ ,  
384  $p > 0.01$ ) but they both correlate with sensation seeking trait ( $r > 0.29$ ,  $p < 0.001$ ) as also found in  
385 previous studies [68]. Castellanos-Ryan et al. [68] have found that these two traits manifest differently in  
386 the brain. Therefore, one can hypothesize that the psychosocial differences (and their associated neural  
387 correlates [68]) between ‘Binge’ and the other AAM phenotypes might explain the 2 – 10% higher accuracy  
388 obtained with ‘Binge’.

389 **Methodological insights:** To the best of our knowledge, this is the first study to analyze and reports results  
390 on the complete longitudinal data from IMAGEN, including the follow-up 3 data. Two previous studies,  
391 Whelan et al. [27] and Seo et al. [30] performed similar ML analysis on the IMAGEN data and unlike us,  
392 found only a weak association between structural imaging and AAM. The logistic regression model in  
393 Whelan et al. [27] scored  $58 \pm 8\%$  ROC-AUC when predicting AAM at age 14 from structural imaging  
394 features collected at age 14 (BL) and  $63 \pm 7\%$  ROC-AUC at predicting AAM at age 16 (FU1). This lower  
395 accuracy with high variance obtained in their experiments can be attributed to - (a) the relatively smaller  
396 sample size used in their study ( $n \sim 265 - 271$ ), (b) unavailability of long-term AAM information from  
397 IMAGEN’s FU2 and FU3 data, (c) using only a linear ML model, and (d) only using GM volume and  
398 thickness as structural features. On the other hand, Seo et al. [30]’s models achieved accuracies in the  
399 range 56 – 58% when predicting AAM at age 19 (FU2) using imaging features from age 19, and did not  
400 get a significant accuracy when they used imaging features from age 14. This lower performance can be  
401 attributed to the following experimental design decisions - (a) Seo et al. [30] used GM volume and thickness  
402 features from just 24 regions of the brain associated to cue-reactivity, (b) their AAM phenotype is not the  
403 best phenotype of AAM as evident from the results of our ML exploration (see results for ‘Combined-seo’  
404 in Figure 5), and (c) the confound-control technique used in their study, confound regression, can result in  
405 under-performance as demonstrated in Figure 4.

406 In contrast to these previous works, our study has the following advantages: First, we use 719 structural  
407 features extracted from 2 MRI modalities, T1w and DTI, that include not only GM volume and thickness  
408 but also surface area, curvature, and WM and GM intensities from all cortical and sub-cortical regions  
409 in the brains. Second, we empirically derive the best AAM label for the task by comparing different  
410 phenotypes previously used in the literature. For the different AAM phenotypes, the balanced accuracies  
411 range between chance to significant performance (45% – 73%), emphasizing the importance of the choice  
412 of the label in such ML studies with low effect sizes. And finally, we test different confound correction  
413 techniques and use the one that effectively controls for the influence of confounds without also destroying  
414 the signal of interest. In summary, the higher accuracy in the current study can be attributed to not just the  
415 availability of long-term data on AAM but also to the rigorous comparison of different labels of AAM,  
416 different ML models and confound control techniques.

417 Among the four different ML models tested, the two non-linear models , SVM-rbf and GB, consistently

418 performed better than the two linear models. We also explicitly ensured that the confounding influence of sex  
419 and site were eliminated by combining suggestions from Grger et al. [46] and Snoek et al. [47]. We found  
420 evidence that the linear confound regression technique used often in previous ML-based neuroimaging  
421 studies [30, 20, 47], might not be the best choice as it cannot be used with non-linear models such as  
422 SVM-rbf or Naive Bayes used in Seo et al. [30] and distorts the signal of interest from the neuroimaging  
423 data [60] as seen in Figure 4. In contrast, counterbalancing using oversampling is recommended as it  
424 successfully removed the influence of the confounds without reducing the sample size in the study.

425 In contrast to the main results, the models failed to achieve significant prediction in the *leave-one-site-out*  
426 experiment and the scores displayed high variance (refer supplement Figure S4). This variance could be  
427 caused by the widely distributed sample sizes across each site resulting in uneven folds in the n-fold CV  
428 (Figure 2). The chance performance might also be due to any site-specific variations in the data<sub>holdout</sub> that  
429 prevailed despite the rigorous data acquisition standards enforced across the sites by the IMAGEN group  
430 [39].

431 **Future work:** An important future work would be to understand how AAM correlates with several psycho-  
432 socio-economic variables and uncover any environmental risk factors such as childhood abuse, parental  
433 drug use, and life event stressors that could be mediating the relationship we discovered between AAM  
434 and brain structure. It would also be interesting to investigate if the functional connectivity (fMRI) in  
435 adolescent brains can also predict AAM [43]. Another important future work would be to reproduce the  
436 results on another data set comprising adolescents from a different geographic area such as NCANDA [32].

## 6 CONCLUSION

437 This study analyzed alcohol misuse in adolescents and their brain structure in the large, longitudinal  
438 IMAGEN dataset consisting of  $n \sim 1182$  healthy adolescents [39, 31]. We found that alcohol misuse in  
439 adolescents can be predicted from their brain structure with a significant and high accuracy of 73% – 78%.  
440 More importantly, alcohol misuse at age 22 could be predicted from the brains at age 14 and age 19 with  
441 significant accuracies of 73.1% and 75.5%, respectively. This suggests that the structural differences in the  
442 brain might at least partly be preceding alcohol misuse behavior [20]. In contrast to previous large-sample  
443 studies that use ML [27, 30], we extensively compared different phenotypes of alcohol misuse such as  
444 frequency of alcohol use, amount of use, the onset of alcohol misuse, and binge drinking occasions and  
445 found that binge drinking is the most predictable phenotype of alcohol misuse. Similarly, we also compared  
446 different ML models and confound-control techniques and found that the two non-linear models - SVM-rbf  
447 and GB - perform better than the two linear models, SVM-lin and LR. Among the confound-control  
448 techniques, we found that counter-balancing with oversampling is most beneficial for the task. To the  
449 best of our knowledge, this was the first study to analyze and report results on the follow-up 3 data from  
450 IMAGEN. The results of our exploratory study advocate that collecting long-term, large cohorts of data,  
451 representative of the population, followed by a systematic ML analysis can greatly benefit research on  
452 complex psychiatric disorders such as AUD.

## AUTHOR CONTRIBUTIONS

453 Roshan Prakash Rane, Evert Ferdinand de Man, and Kerstin Ritter designed the study. Evert Ferdinand de  
454 Man preprocessed the data. Evert Ferdinand de Man and Roshan Prakash Rane performed the data analysis.  
455 JiHoon Kim contributed to the feature visualization. Roshan Prakash Rane, Kerstin Ritter, Evert Ferdinand  
456 de Man, Kai Grger, Mira Tschorn, Henrik Walter, and Andreas Heinz prepared the manuscript. All other  
457 co-authors performed data acquisition and revised the manuscript.



## ACKNOWLEDGMENTS

458 We acknowledge support from the German Research Foundation (DFG, 389563835; 402170461-TRR 265;  
459 414984028-CRC 1404; EXC 2002/1 “Science of Intelligence” – project number 390523135), the Brain  
460 & Behavior Research Foundation (NARSAD grant) and the Manfred and Ursula-Müller Stiftung. Gunter  
461 Schumann is a recipient of an Alexander von Humboldt Preis and a National Science Foundation of China  
462 (NSFC) Research Fund for International Scientists (Grant No. 82150710554).

## REFERENCES

- 463 1 .Fulton Crews, Jun He, and Clyde Hodge. Adolescent cortical development: a critical period of  
464 vulnerability for addiction. *Pharmacology Biochemistry and Behavior*, 86(2):189–199, 2007.
- 465 2 .David J DeWit, Edward M Adlaf, David R Offord, and Alan C Ogborne. Age at first alcohol use: a  
466 risk factor for the development of alcohol disorders. *American Journal of Psychiatry*, 157(5):745–750,  
467 2000.
- 468 3 .Julia D Grant, Jeffrey F Scherrer, Michael T Lynskey, Michael J Lyons, Seth A Eisen, Ming T Tsuang,  
469 William R True, and Kathleen K Bucholz. Adolescent alcohol use is a risk factor for adult alcohol and  
470 drug dependence: evidence from a twin design. *Psychological medicine*, 36(1):109–118, 2006.
- 471 4 .Kimberly Nixon and Justin A McClain. Adolescence as a critical window for developing an alcohol  
472 use disorder: current findings in neuroscience. *Current opinion in psychiatry*, 23(3):227, 2010.
- 473 5 .Catherine Lebel and Christian Beaulieu. Longitudinal development of human brain wiring continues  
474 from childhood into adulthood. *Journal of Neuroscience*, 31(30):10937–10947, 2011.
- 475 6 .Jay N Giedd. Structural magnetic resonance imaging of the adolescent brain. *Annals of the new York  
476 Academy of Sciences*, 1021(1):77–85, 2004.
- 477 7 .Peter M Monti, Robert Miranda Jr, Kimberly Nixon, Kenneth J Sher, H Scott Swartzwelder, Susan F  
478 Tapert, Aaron White, and Fulton T Crews. Adolescence: booze, brains, and behavior. *Alcoholism:  
479 Clinical and Experimental Research*, 29(2):207–220, 2005.
- 480 8 .R Andrew Chambers, Jane R Taylor, and Marc N Potenza. Developmental neurocircuitry of motivation  
481 in adolescence: a critical period of addiction vulnerability. *American journal of psychiatry*, 160(6):  
482 1041–1052, 2003.
- 483 9 .Michael D De Bellis, Duncan B Clark, Sue R Beers, Paul H Soloff, Amy M Boring, Julie Hall, Adam  
484 Kersh, and Matcheri S Keshavan. Hippocampal volume in adolescent-onset alcohol use disorders.  
485 *American Journal of Psychiatry*, 157(5):737–744, 2000.
- 486 10 .Bonnie J Nagel, Alecia D Schweinsburg, Vinh Phan, and Susan F Tapert. Reduced hippocampal  
487 volume among adolescents with alcohol use disorders without psychiatric comorbidity. *Psychiatry  
488 Research: Neuroimaging*, 139(3):181–190, 2005.
- 489 11 .Michael D De Bellis, Anandhi Narasimhan, Dawn L Thatcher, Matcheri S Keshavan, Paul Soloff, and  
490 Duncan B Clark. Prefrontal cortex, thalamus, and cerebellar volumes in adolescents and young adults  
491 with adolescent-onset alcohol use disorders and comorbid mental disorders. *Alcoholism: Clinical and  
492 Experimental Research*, 29(9):1590–1600, 2005.
- 493 12 .Lindsay M Squeglia, Scott F Sorg, Alecia Dager Schweinsburg, Reagan R Wetherill, Carmen Pulido,  
494 and Susan F Tapert. Binge drinking differentially affects adolescent male and female brain morphometry.  
495 *Psychopharmacology*, 220(3):529–539, 2012.
- 496 13 .Tim McQueeny, Brian C Schweinsburg, Alecia D Schweinsburg, Joanna Jacobus, Sunita Bava,  
497 Lawrence R Frank, and Susan F Tapert. Altered white matter integrity in adolescent binge drinkers.  
498 *Alcoholism: Clinical and experimental research*, 33(7):1278–1285, 2009.

- 499 **14** .Scott A Jones and Bonnie J Nagel. Altered frontostriatal white matter microstructure is associated  
500 with familial alcoholism and future binge drinking in adolescence. *Neuropsychopharmacology*, 44(6):  
501 1076–1083, 2019.
- 502 **15** .Scott A Jones, Jordan M Lueras, and Bonnie J Nagel. Effects of binge drinking on the developing  
503 brain: studies in humans. *Alcohol research: current reviews*, 39(1):87, 2018.
- 504 **16** .Joanna Jacobus, Lindsay M Squeglia, Sunita Bava, and Susan F Tapert. White matter characterization  
505 of adolescent binge drinking with and without co-occurring marijuana use: a 3-year investigation.  
506 *Psychiatry Research: Neuroimaging*, 214(3):374–381, 2013.
- 507 **17** .Monica Luciana, Paul F Collins, Ryan L Muetzel, and Kelvin O Lim. Effects of alcohol use initiation  
508 on brain structure in typically developing adolescents. *The American journal of drug and alcohol*  
509 *abuse*, 39(6):345–355, 2013.
- 510 **18** .Adolf Pfefferbaum, Dongjin Kwon, Ty Brumback, Wesley K Thompson, Kevin Cummins, Susan F  
511 Tapert, Sandra A Brown, Ian M Colrain, Fiona C Baker, Devin Prouty, et al. Altered brain developmental  
512 trajectories in adolescents after initiating drinking. *American journal of psychiatry*, 175(4):370–380,  
513 2018.
- 514 **19** .Edith V Sullivan, Ty Brumback, Susan F Tapert, Sandra A Brown, Fiona C Baker, Ian M Colrain, Devin  
515 Prouty, Michael D De Bellis, Duncan B Clark, Bonnie J Nagel, et al. Disturbed cerebellar growth  
516 trajectories in adolescents who initiate alcohol drinking. *Biological psychiatry*, 87(7):632–644, 2020.
- 517 **20** .Gabriel H Robert, Qiang Luo, Tao Yu, Congying Chu, Alex Ing, Tianye Jia, Dimitri Papadopoulos  
518 Orfanos, Erin Burke-Quinlan, Sylvane Desrivieres, Barbara Ruggeri, et al. Association of gray  
519 matter and personality development with increased drunkenness frequency during adolescence. *JAMA*  
520 *psychiatry*, 77(4):409–419, 2020.
- 521 **21** .Natalie M Zahr and Adolf Pfefferbaum. Alcohol’s effects on the brain: neuroimaging results in humans  
522 and animal models. *Alcohol research: current reviews*, 38(2):183, 2017.
- 523 **22** .Bridget F Grant, Risë B Goldstein, Tulshi D Saha, S Patricia Chou, Jeesun Jung, Haitao Zhang, Roger P  
524 Pickering, W June Ruan, Sharon M Smith, Boji Huang, et al. Epidemiology of dsm-5 alcohol use  
525 disorder: results from the national epidemiologic survey on alcohol and related conditions iii. *JAMA*  
526 *psychiatry*, 72(8):757–766, 2015.
- 527 **23** .Katherine S Button, John PA Ioannidis, Claire Mokrysz, Brian A Nosek, Jonathan Flint, Emma SJ  
528 Robinson, and Marcus R Munafò. Power failure: why small sample size undermines the reliability of  
529 neuroscience. *Nature reviews neuroscience*, 14(5):365–376, 2013.
- 530 **24** .Martin A Lindquist and Amanda Mejia. Zen and the art of multiple comparisons. *Psychosomatic*  
531 *medicine*, 77(2):114, 2015.
- 532 **25** .John PA Ioannidis. Why most published research findings are false. *PLoS medicine*, 2(8):e124, 2005.
- 533 **26** .Anne M Scheel, Mitchell RMJ Schijen, and Daniël Lakens. An excess of positive results: Comparing  
534 the standard psychology literature with registered reports. *Advances in Methods and Practices in*  
535 *Psychological Science*, 4(2):25152459211007467, 2021.
- 536 **27** .Robert Whelan, Richard Watts, Catherine A Orr, Robert R Althoff, Eric Artiges, Tobias Banaschewski,  
537 Gareth J Barker, Arun LW Bokde, Christian Büchel, Fabiana M Carvalho, et al. Neuropsychosocial  
538 profiles of current and future adolescent alcohol misusers. *Nature*, 512(7513):185–189, 2014.
- 539 **28** .Lindsay M Squeglia, Susan F Tapert, Edith V Sullivan, Joanna Jacobus, MJ Meloy, Torsten Rohlfing,  
540 and Adolf Pfefferbaum. Brain development in heavy-drinking adolescents. *American journal of*  
541 *psychiatry*, 172(6):531–542, 2015.
- 542 **29** .Simone Kühn, Anna Mascharek, Tobias Banaschewski, Arun Bodke, Uli Bromberg, Christian Büchel,  
543 Erin Burke Quinlan, Sylvane Desrivieres, Herta Flor, Antoine Grigis, et al. Predicting development of

- 544 adolescent drinking behaviour from whole brain structure at 14 years of age. *Elife*, 8:e44056, 2019.
- 545 **30** .Sambu Seo, Anne Beck, Caroline Matthis, Alexander Genauck, Tobias Banaschewski, Arun LW Bokde,  
546 Uli Bromberg, Christian Büchel, Erin Burke Quinlan, Herta Flor, et al. Risk profiles for heavy drinking  
547 in adolescence: differential effects of gender. *Addiction biology*, 24(4):787–801, 2019.
- 548 **31** .Lea Mascarell Maričić, Henrik Walter, Annika Rosenthal, Stephan Ripke, Erin Burke Quinlan, Tobias  
549 Banaschewski, Gareth J Barker, Arun LW Bokde, Uli Bromberg, Christian Büchel, et al. The imagen  
550 study: A decade of imaging genetics in adolescents. *Molecular Psychiatry*, 25(11):2648–2671, 2020.
- 551 **32** .Sandra A Brown, Ty Brumback, Kristin Tomlinson, Kevin Cummins, Wesley K Thompson, Bonnie J  
552 Nagel, Michael D De Bellis, Stephen R Hooper, Duncan B Clark, Tammy Chung, et al. The national  
553 consortium on alcohol and neurodevelopment in adolescence (ncanda): a multisite study of adolescent  
554 development and substance use. *Journal of studies on alcohol and drugs*, 76(6):895–908, 2015.
- 555 **33** .Cathie Sudlow, John Gallacher, Naomi Allen, Valerie Beral, Paul Burton, John Danesh, Paul Downey,  
556 Paul Elliott, Jane Green, Martin Landray, et al. Uk biobank: an open access resource for identifying the  
557 causes of a wide range of complex diseases of middle and old age. *Plos med*, 12(3):e1001779, 2015.
- 558 **34** .Lindsay M Squeglia, Tali M Ball, Joanna Jacobus, Ty Brumback, Benjamin S McKenna, Tam T  
559 Nguyen-Louie, Scott F Sorg, Martin P Paulus, and Susan F Tapert. Neural predictors of initiating  
560 alcohol use during adolescence. *American journal of psychiatry*, 174(2):172–185, 2017.
- 561 **35** .Martin N Hebart and Chris I Baker. Deconstructing multivariate decoding for the study of brain  
562 function. *Neuroimage*, 180:4–18, 2018.
- 563 **36** .Junji Shiraishi, Qiang Li, Daniel Appelbaum, and Kunio Doi. Computer-aided diagnosis and artificial  
564 intelligence in clinical imaging. In *Seminars in nuclear medicine*, volume 41, pages 449–462. Elsevier,  
565 2011.
- 566 **37** .Scott M Lundberg and Su-In Lee. A unified approach to interpreting model predictions. In *Proceedings*  
567 *of the 31st international conference on neural information processing systems*, pages 4768–4777, 2017.
- 568 **38** .Scott M Lundberg, Gabriel Erion, Hugh Chen, Alex DeGrave, Jordan M Prutkin, Bala Nair, Ronit Katz,  
569 Jonathan Himmelfarb, Nisha Bansal, and Su-In Lee. From local explanations to global understanding  
570 with explainable ai for trees. *Nature machine intelligence*, 2(1):56–67, 2020.
- 571 **39** .G Schumann, E Loth, T Banaschewski, A Barbot, G Barker, C Büchel, PJ Conrod, JW Dalley, H Flor,  
572 J Gallinat, et al. The imagen study: reinforcement-related behaviour in normal brain function and  
573 psychopathology. *Molecular psychiatry*, 15(12):1128–1139, 2010.
- 574 **40** .Bradley T Wyman, Danielle J Harvey, Karen Crawford, Matt A Bernstein, Owen Carmichael, Patricia E  
575 Cole, Paul K Crane, Charles DeCarli, Nick C Fox, Jeffrey L Gunter, et al. Standardization of analysis  
576 sets for reporting results from adni mri data. *Alzheimer's & Dementia*, 9(3):332–337, 2013.
- 577 **41** .Derek Kenton Jones, Steve Charles Rees Williams, David Gasston, Mark Andrew Horsfield, Andrew  
578 Simmons, and Robert Howard. Isotropic resolution diffusion tensor imaging with whole brain  
579 acquisition in a clinically acceptable time. *Human brain mapping*, 15(4):216–230, 2002.
- 580 **42** .Stephen M Smith, Mark Jenkinson, Heidi Johansen-Berg, Daniel Rueckert, Thomas E Nichols, Clare E  
581 Mackay, Kate E Watkins, Olga Ciccarelli, M Zaheer Cader, Paul M Matthews, et al. Tract-based spatial  
582 statistics: voxelwise analysis of multi-subject diffusion data. *Neuroimage*, 31(4):1487–1505, 2006.
- 583 **43** .Hongtao Ruan, Yunyi Zhou, Qiang Luo, Gabriel H Robert, Sylvane Desrivières, Erin Burke Quinlan,  
584 ZhaoWen Liu, Tobias Banaschewski, Arun LW Bokde, Uli Bromberg, et al. Adolescent binge drinking  
585 disrupts normal trajectories of brain functional organization and personality maturation. *NeuroImage:*  
586 *Clinical*, 22:101804, 2019.
- 587 **44** .Friederike Deeken, Tobias Banaschewski, Ulrike Kluge, and Michael A Rapp. Risk and protective  
588 factors for alcohol use disorders across the lifespan. *Current Addiction Reports*, 7:245–251, 2020.

- 589 **45** .Anil Rao, Joao M Monteiro, Janaina Mourao-Miranda, Alzheimer's Disease Initiative, et al. Predictive  
590 modelling using neuroimaging data in the presence of confounds. *NeuroImage*, 150:23–49, 2017.
- 591 **46** .Kai Gørgen, Martin N Hebart, Carsten Allefeld, and John-Dylan Haynes. The same analysis approach:  
592 Practical protection against the pitfalls of novel neuroimaging analysis methods. *Neuroimage*, 180:  
593 19–30, 2018.
- 594 **47** .Lukas Snoek, Steven Miletić, and H Steven Scholte. How to control for confounds in decoding analyses  
595 of neuroimaging data. *NeuroImage*, 184:741–760, 2019.
- 596 **48** .Edward Vul, Christine Harris, Piotr Winkielman, and Harold Pashler. Puzzlingly high correlations in  
597 fmri studies of emotion, personality, and social cognition. *Perspectives on psychological science*, 4(3):  
598 274–290, 2009.
- 599 **49** .Nikolaus Kriegeskorte, W Kyle Simmons, Patrick SF Bellgowan, and Chris I Baker. Circular analysis  
600 in systems neuroscience: the dangers of double dipping. *Nature neuroscience*, 12(5):535–540, 2009.
- 601 **50** .Junhao Wen, Elina Thibeau-Sutre, Mauricio Diaz-Melo, Jorge Samper-González, Alexandre Routier,  
602 Simona Bottani, Didier Dormont, Stanley Durrleman, Ninon Burgos, Olivier Colliot, et al.  
603 Convolutional neural networks for classification of alzheimer's disease: Overview and reproducible  
604 evaluation. *Medical image analysis*, 63:101694, 2020.
- 605 **51** .Bernhard E Boser, Isabelle M Guyon, and Vladimir N Vapnik. A training algorithm for optimal margin  
606 classifiers. In *Proceedings of the fifth annual workshop on Computational learning theory*, pages  
607 144–152, 1992.
- 608 **52** .Olivier Chapelle, Vladimir Vapnik, Olivier Bousquet, and Sayan Mukherjee. Choosing multiple  
609 parameters for support vector machines. *Machine learning*, 46(1):131–159, 2002.
- 610 **53** .Jerome H Friedman. Greedy function approximation: a gradient boosting machine. *Annals of statistics*,  
611 pages 1189–1232, 2001.
- 612 **54** .Rong-En Fan, Kai-Wei Chang, Cho-Jui Hsieh, Xiang-Rui Wang, and Chih-Jen Lin. Liblinear: A library  
613 for large linear classification. *the Journal of machine Learning research*, 9:1871–1874, 2008.
- 614 **55** .Tianqi Chen and Carlos Guestrin. Xgboost: A scalable tree boosting system. In *Proceedings of the*  
615 *22nd acm sigkdd international conference on knowledge discovery and data mining*, pages 785–794,  
616 2016.
- 617 **56** .David H Wolpert and William G Macready. No free lunch theorems for optimization. *IEEE transactions*  
618 *on evolutionary computation*, 1(1):67–82, 1997.
- 619 **57** .Ryan J Urbanowicz and Jason H Moore. Exstracs 2.0: description and evaluation of a scalable learning  
620 classifier system. *Evolutionary intelligence*, 8(2):89–116, 2015.
- 621 **58** .Yoshua Bengio and Yves Grandvalet. No unbiased estimator of the variance of k-fold cross-validation.  
622 *Journal of machine learning research*, 5(Sep):1089–1105, 2004.
- 623 **59** .Markus Ojala and Gemma C Garriga. Permutation tests for studying classifier performance. *Journal of*  
624 *Machine Learning Research*, 11(6), 2010.
- 625 **60** .Richard Dinga, Lianne Schmaal, Brenda WJH Penninx, Dick J Veltman, and Andre F Marquand.  
626 Controlling for effects of confounding variables on machine learning predictions. *BioRxiv*, 2020.
- 627 **61** .Henry R Kranzler and Michael Soyka. Diagnosis and pharmacotherapy of alcohol use disorder: a  
628 review. *Jama*, 320(8):815–824, 2018.
- 629 **62** .Sandra Sanchez-Roige, Abraham A Palmer, Pierre Fontanillas, Sarah L Elson, the Substance Use  
630 Disorder Working Group of the Psychiatric Genomics Consortium 23andMe Research Team, Mark J  
631 Adams, David M Howard, Howard J Edenberg, Gail Davies, Richard C Crist, et al. Genome-  
632 wide association study meta-analysis of the alcohol use disorders identification test (audit) in two  
633 population-based cohorts. *American Journal of Psychiatry*, 176(2):107–118, 2019.

- 634 **63** .Laurie M Baker, Leanne M Williams, Mayuresh S Korgaonkar, Ronald A Cohen, Jodi M Heaps, and  
635 Robert H Paul. Impact of early vs. late childhood early life stress on brain morphometrics. *Brain*  
636 *imaging and behavior*, 7(2):196–203, 2013.
- 637 **64** .Marisa C Ross, Delaney Dvorak, Anneliis Sartin-Tarm, Chloe Botsford, Ian Cogswell, Ashley  
638 Hoffstetter, Olivia Putnam, Chloe Schomaker, Penda Smith, Anna Stalsberg, et al. Gray matter  
639 volume correlates of adolescent posttraumatic stress disorder: A comparison of manual intervention  
640 and automated segmentation in freesurfer. *Psychiatry Research: Neuroimaging*, 313:111297, 2021.
- 641 **65** .Leon French, Courtney Gray, Gabriel Leonard, Michel Perron, G Bruce Pike, Louis Richer, Jean R  
642 Séguin, Suzanne Veillette, C John Evans, Eric Artiges, et al. Early cannabis use, polygenic risk score  
643 for schizophrenia and brain maturation in adolescence. *JAMA psychiatry*, 72(10):1002–1011, 2015.
- 644 **66** .Josiane Bourque, Travis E Baker, Alain Dagher, Alan C Evans, Hugh Garavan, Marco Leyton, Jean R  
645 Séguin, Robert Pihl, and Patricia J Conrod. Effects of delaying binge drinking on adolescent brain  
646 development: a longitudinal neuroimaging study. *BMC psychiatry*, 16(1):1–9, 2016.
- 647 **67** .Natalie Castellanos-Ryan, Maeve O’Leary-Barrett, Laura Sully, and Patricia Conrod. Sensitivity and  
648 specificity of a brief personality screening instrument in predicting future substance use, emotional, and  
649 behavioral problems: 18-month predictive validity of the substance use risk profile scale. *Alcoholism:  
650 Clinical and experimental research*, 37:E281–E290, 2013.
- 651 **68** .Natalie Castellanos-Ryan, Katya Rubia, and Patricia J Conrod. Response inhibition and reward  
652 response bias mediate the predictive relationships between impulsivity and sensation seeking and  
653 common and unique variance in conduct disorder and substance misuse. *Alcoholism: Clinical and  
654 Experimental Research*, 35(1):140–155, 2011.

## AFFILIATIONS

- 655 <sup>1</sup>Charité – Universitätsmedizin Berlin (corporate member of Freie Universität Berlin, Humboldt-Universität zu Berlin, and  
656 Berlin Institute of Health), Department of Psychiatry and Psychotherapy, Bernstein Center for Computational Neuroscience,  
657 Berlin, Germany
- 658 <sup>2</sup>Faculty IV – Electrical Engineering and Computer Science, Technische Universität Berlin, Berlin, Germany
- 659 <sup>3</sup>Department of Education and Psychology, Freie Universität Berlin, Berlin, Germany
- 660 <sup>4</sup>Science of Intelligence, Research Cluster of Excellence, Marchstr. 23, 10587 Berlin, <https://www.scienceofintelligence.de>
- 661 <sup>5</sup>Social and Preventive Medicine, Department of Sports and Health Sciences, Intra-faculty unit “Cognitive Sciences”, Faculty  
662 of Human Science, and Faculty of Health Sciences Brandenburg, Research Area Services Research and e-Health, University  
663 of Potsdam, Potsdam, Germany
- 664 <sup>6</sup>Department of Child and Adolescent Psychiatry and Psychotherapy, Central Institute of Mental Health, Medical Faculty  
665 Mannheim, Heidelberg University, Square J5, 68159 Mannheim, Germany
- 666 <sup>7</sup>Discipline of Psychiatry, School of Medicine and Trinity College Institute of Neuroscience, Trinity College Dublin, Dublin,  
667 Ireland
- 668 <sup>8</sup>Centre for Population Neuroscience and Precision Medicine (PONS), Institute of Psychiatry, Psychology Neuroscience,  
669 SGDP Centre, King’s College London, United Kingdom
- 670 <sup>9</sup>Institute of Cognitive and Clinical Neuroscience, Central Institute of Mental Health, Medical Faculty Mannheim, Heidelberg  
671 University, Square J5, Mannheim, Germany
- 672 <sup>10</sup>Department of Psychology, School of Social Sciences, University of Mannheim, 68131 Mannheim, German
- 673 <sup>11</sup>NeuroSpin, CEA, Université Paris-Saclay, F-91191 Gif-sur-Yvette, France
- 674 <sup>12</sup>Departments of Psychiatry and Psychology, University of Vermont, 05405 Burlington, Vermont, USA
- 675 <sup>13</sup>Sir Peter Mansfield Imaging Centre School of Physics and Astronomy, University of Nottingham, University Park,  
676 Nottingham, United Kingdom

677 <sup>14</sup>*Physikalisch-Technische Bundesanstalt (PTB), Braunschweig and Berlin, Germany*  
678 <sup>15</sup>*Institut National de la Santé et de la Recherche Médicale, INSERM U A10 "Trajectoires développementales en psychiatrie",*  
679 *Université Paris-Saclay, Ecole Normale supérieure Paris-Saclay, CNRS, Centre Borelli; Gif-sur-Yvette, France*  
680 <sup>16</sup>*Institut National de la Santé et de la Recherche Médicale, INSERM U A10 "Trajectoires développementales psychiatrie",*  
681 *University Paris-Saclay, Ecole Normale Supérieure Paris-Saclay, CNRS; Centre Borelli, Gif-sur-Yvette, France; and AP-HP*  
682 *Sorbonne Université, Department of Child and Adolescent Psychiatry, Pitié-Salpêtrière Hospital, Paris, France*  
683 <sup>17</sup>*Institut National de la Santé et de la Recherche Médicale, INSERM U A10 "Trajectoires développementales en psychiatrie";*  
684 *Université Paris-Saclay, Ecole Normale supérieure Paris-Saclay, CNRS, Centre Borelli, Gif-sur-Yvette; and Psychiatry*  
685 *Department, EPS Barthélémy Durand, Etampes, France*  
686 <sup>18</sup>*Institut des Maladies Neurodégénératives, UMR 5293, CNRS, CEA, Université de Bordeaux, 33076 Bordeaux, France;*  
687 <sup>19</sup>*Department of Psychiatry, Faculty of Medicine and Centre Hospitalier Universitaire Sainte-Justine, University of Montreal,*  
688 *Montreal, Quebec, Canada*  
689 <sup>20</sup>*Departments of Psychiatry and Psychology, University of Toronto, Toronto, Ontario, Canada*  
690 <sup>21</sup>*Department of Child and Adolescent Psychiatry and Psychotherapy, University Medical Centre Göttingen, von-Siebold-Str.*  
691 *5, 37075, Göttingen, Germany*  
692 <sup>22</sup>*Department of Psychiatry and Neuroimaging Center, Technische Universität Dresden, Dresden, Germany*  
693 <sup>23</sup>*Department of Psychological Medicine, Section for Eating Disorders, Institute of Psychiatry, Psychology and Neuroscience,*  
694 *King's College London, London, SE5 8AF, UK* <sup>24</sup>*Department of Education and Psychology, Freie Universität Berlin, Berlin,*  
695 *Germany*  
696 <sup>25</sup>*School of Psychology and Global Brain Health Institute, Trinity College Dublin, Ireland*  
697 <sup>26</sup>*PONS Research Group, Dept of Psychiatry and Psychotherapy, Campus Charite Mitte, Humboldt University, Berlin*
